# Supplementary material for: Enhancement of hydroxide conductivity by grafting flexible pendant imidazolium groups into poly(arylene ether sulfone) as anion exchange membranes
Source: Royal Society of Chemistry journal article supplement (doi:10.1039/c5ta04257g), 2015-01-01
Supplement: c5ta04257g1.pdf [file c5ta04257g1.pdf]

*Supplementary Information*

Enhancement of hydroxide conductivity by grafting flexible pendant imidazolium groups into poly(arylene ether sulfone) as anion exchange membranes

Yi Zhi Zhuo, Ao Lan Lai, Qiu Gen Zhang, Ai Mei Zhu, Mei Ling Ye and Qing Lin Liu\*

*Fujian Provincial Key Laboratory of Theoretical and Computational Chemistry, Department of Chemical & Biochemical Engineering, The College of Chemistry and Chemical Engineering, Xiamen University, Xiamen 361005, P. R. China*

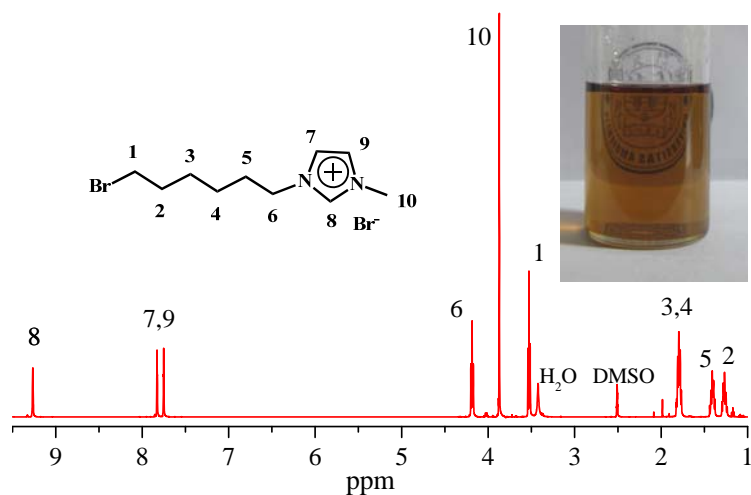

**Fig. S1** The  $^1\text{H}$  NMR spectra and the digital photo of 6BrIm.

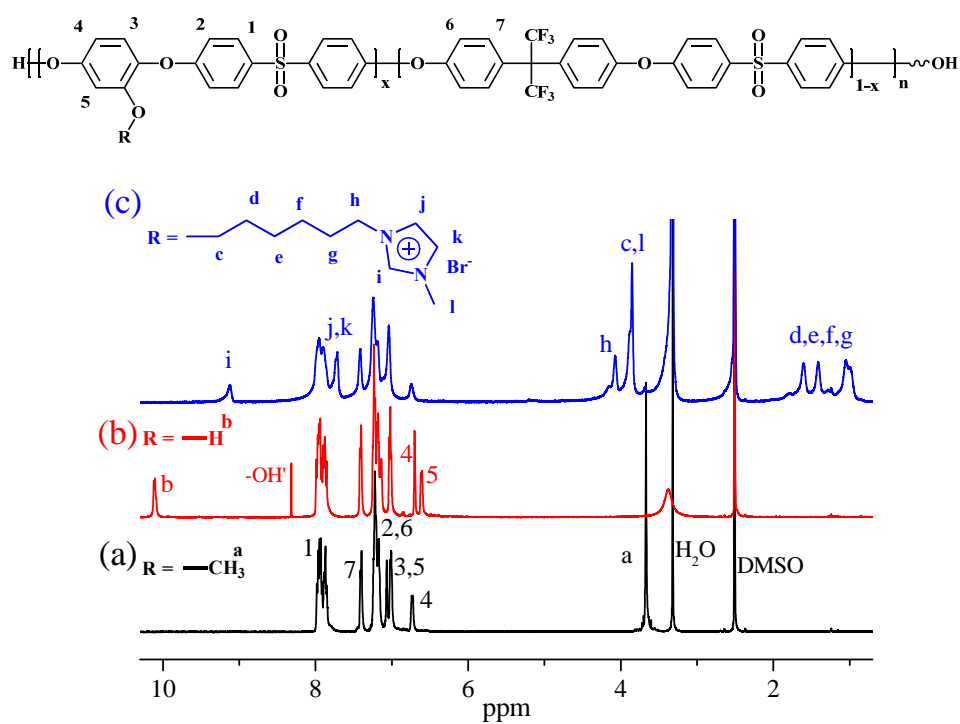

**Fig. S2** The  $^1\text{H}$  NMR spectra of (a) MPES-0.7, (b) HPES-0.7 and (c) ImPES-0.7.

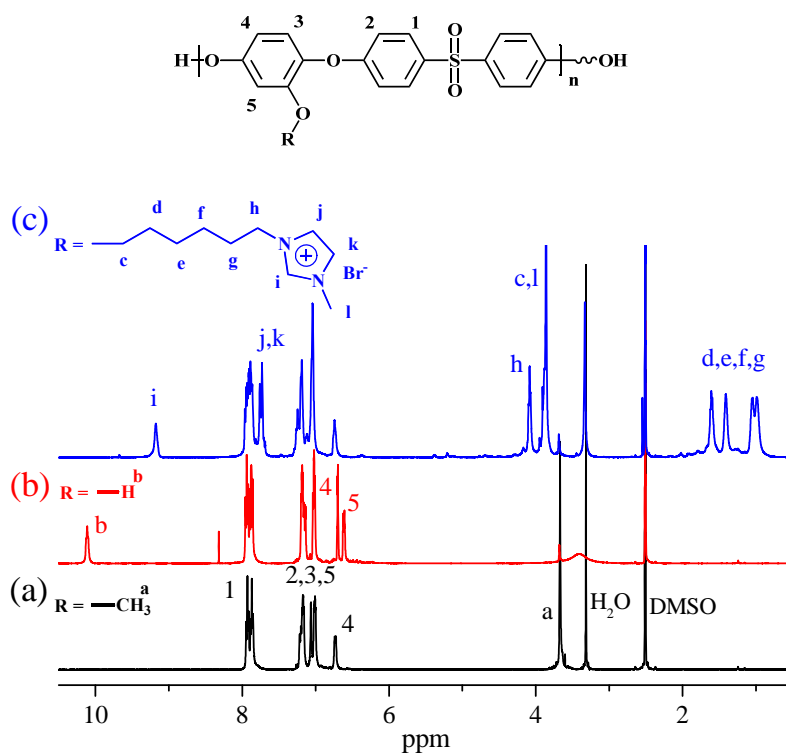

**Fig. S3** The  $^1H$  NMR spectra of (a) MPES-1.0, (b) HPES-1.0 and (c) ImPES-1.0.

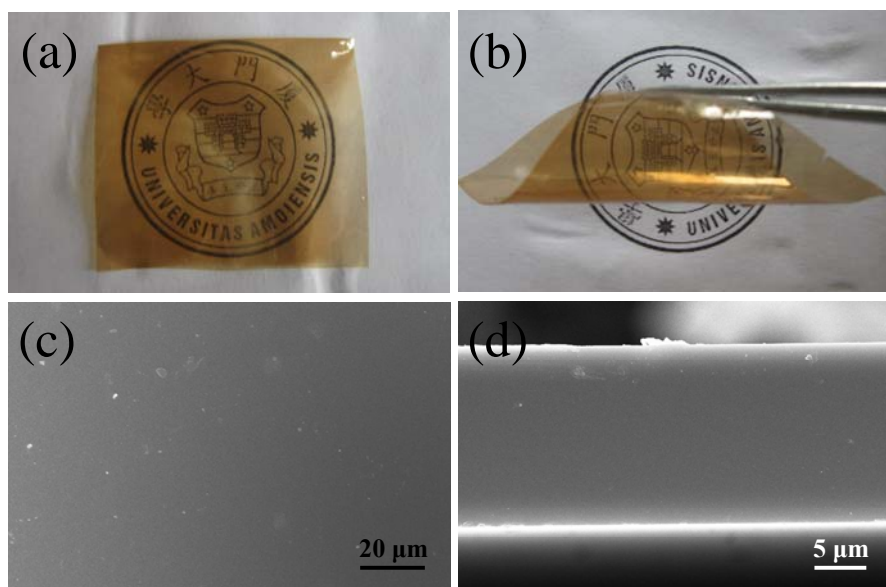

**Fig. S4** Image of the ImPES-0.85 membrane: (a, b) digital photo and SEM, (c) top-surface, and (d) cross-section.
